# Supplementary material for: Co-delivery of carboplatin and paclitaxel via cross-linked multilamellar liposomes for ovarian cancer treatment
Source: Royal Society of Chemistry journal article supplement (doi:10.1039/c7ra01100h), 2017-01-01
Supplement: c7ra01100h1.pdf [file c7ra01100h1.pdf]

# **Co-delivery of Carboplatin and Paclitaxel via Cross-linked Multilamellar Liposome for Ovarian Cancer Treatment**

## **Supplementary Information**

**TableS1.** Zeta potential of cMLVs.

| Formulation        | cMLV       | cMLV(CPT)  | cMLV(PTX)  | cMLV(CPT+PTX) |
|--------------------|------------|------------|------------|---------------|
| Zeta Potential(mV) | -3.76±0.17 | -3.51±0.18 | -3.64±0.18 | -3.63±0.29    |

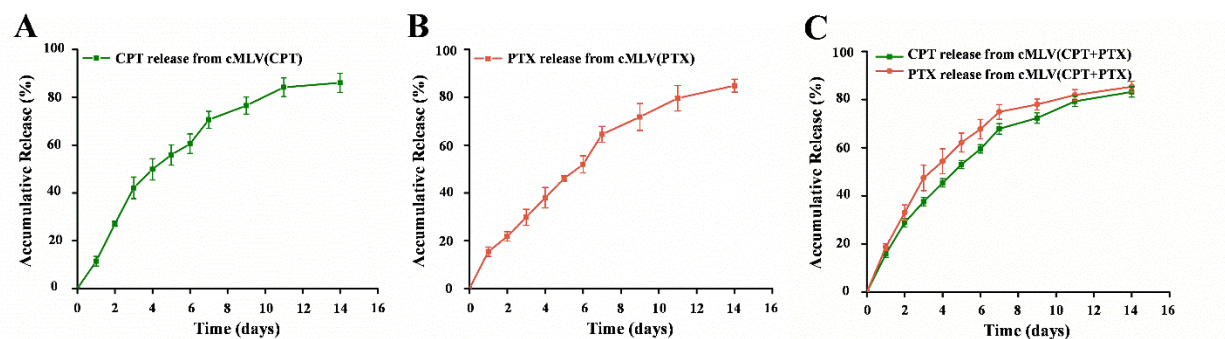

**Fig. S1** In vitro release profiles of carboplatin and paclitaxel from cMLV(CPT) (A), cMLV(PTX)(B) and cMLVs(CPT+PTX) (C). Error bars represent the standard deviation of the mean from triplicate experiments.

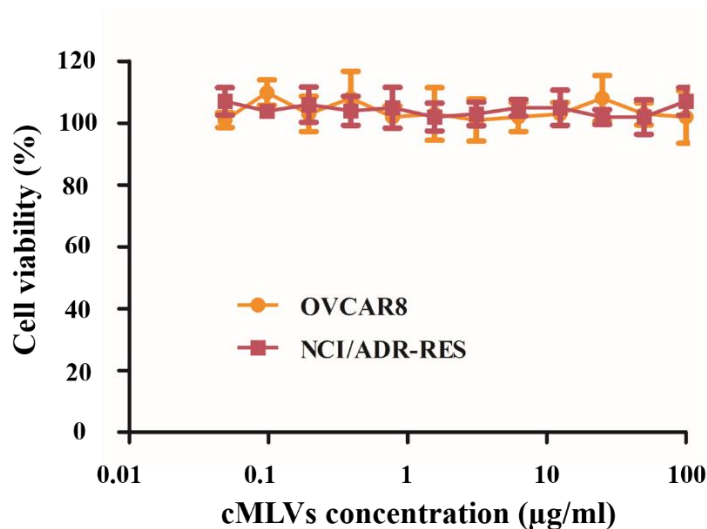

**Fig. S2** In vitro cytotoxicity profiles of cMLVs against OVCAR8 and NCI/ADR-RES cells.
